RESEARCH ARTICLE

# Lifestyle factors and oncogenic papillomavirus infection in a high-risk male population

Elena Lopez-Diez<sup>1\*</sup>, Sonia Perez<sup>2</sup>, Manuel Carballo<sup>1</sup>, Amparo Iñarrea<sup>3</sup>, Angel de la Orden<sup>3</sup>, Maximo Castro<sup>1</sup>, Moises Rodríguez<sup>1</sup>, Sheila Almuster<sup>1</sup>, Ruben Montero<sup>1</sup>, Miguel Perez<sup>1</sup>, Jorge Sanchez<sup>1</sup>, Antonio Ojea<sup>1</sup>

**1** Department of Urology, University Hospital of Vigo, Vigo, Spain, **2** Department of Microbiology, University Hospital of Vigo, Vigo, Spain, **3** Department of Obstetrics and Gynecology, University Hospital of Vigo, Vigo, Spain

\* [elena.lopez.diez@sergas.es](mailto:elena.lopez.diez@sergas.es)

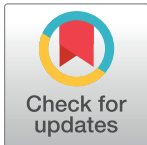

## Abstract

### Background

High risk human papillomavirus (HR-HPV) infection in males is a health issue with implications for HPV-related lesions in their partners. The identification of risk factors for male infection may improve our understanding of HR-HPV transmission and prevention. The aim of this study was to evaluate the relationships between lifestyle, genital warts and HR-HPV infection. The study was focused on men with an increased risk of HR-HPV infection: male sexual partners of women diagnosed with high-grade squamous intraepithelial cervical lesions.

### Methods

Men were enrolled and prospectively recruited within the first six months after diagnosis of cervical lesions in their female partners ( $n = 175$ , 2013–2016). Epidemiological and sexual behaviour data were obtained. The presence of genital warts was established by visual inspection. Detection and genotyping of HR-HPV infection in genital samples were performed with a Linear Array HPV Genotyping Test. All HR-HPV positive men were offered a follow-up exam at 12 months. SPSS version 19 was used for statistical analysis.

### Results and discussion

The prevalence of HR-HPV infection in men was 45.1% (79/175). Genital warts were observed in 10.3% (18/175) of the subjects. Detection of genital warts (OR 3.5,  $p = 0.015$ ), smoking habits (OR 2.3,  $p = 0.006$ ) and sexual debut before 16 years old (OR 2,  $p = 0.035$ ) were associated with an increased risk for HR-HPV infection (univariate analysis). This association was also observed for genital warts and smoking status in a multivariate analysis. The same genotype was found after one year in 71.4% (20/28) of subjects.

## OPEN ACCESS

**Citation:** Lopez-Diez E, Perez S, Carballo M, Iñarrea A, de la Orden A, Castro M, et al. (2017) Lifestyle factors and oncogenic papillomavirus infection in a high-risk male population. PLoS ONE 12(9): e0184492. <https://doi.org/10.1371/journal.pone.0184492>

**Editor:** Magdalena Grce, Rudjer Boskovic Institute, CROATIA

**Received:** February 11, 2017

**Accepted:** August 24, 2017

**Published:** September 12, 2017

**Copyright:** © 2017 Lopez-Diez et al. This is an open access article distributed under the terms of the [Creative Commons Attribution License](https://creativecommons.org/licenses/by/4.0/), which permits unrestricted use, distribution, and reproduction in any medium, provided the original author and source are credited.

**Data Availability Statement:** All relevant data are within the paper and its Supporting Information files.

**Funding:** The authors received no specific funding for this work.

**Competing interests:** The authors have declared that no competing interests exist.

## Conclusions

The presence of genital warts and smoking habits seem to be associated with a higher risk of HR-HPV infection in males. Earlier sexual debut may increase this risk. Extensive knowledge of the natural history of HR-HPV infection in males is an absolute requirement for the design and implementation of prevention strategies for the general population as well as for specific populations such as couples after treatment for high-grade cervical lesions.

## Background

Human papillomavirus (HPV) infection is one of the most common sexually transmitted infections. It is known that up to 70% of both men and women of the world population will be infected during their lifetime. Approximately 60 HPV genotypes are involved in infection of the genital tract, and at least 12 genotypes are considered to be high risk (HR-HPV) or oncogenic [1,2] with different carcinogenic potential depending on the HR-HPV genotype.

The main consequence of HR-HPV infection is cervical cancer, being which is one of the leading causes of cancer-related mortality in women [3]. This relationship accounts for 99.7% of cervical cancer worldwide and 96.8% in our community, as described in detail previously [4]. Moreover, previous studies suggested that cancers of penis and cervix may share the same aetiological factors [5]. Although rare, penile cancer is associated with a high morbidity and mortality. The carcinogenesis of penile cancer is thought to involve two pathways: one related to inflammation and other dermatological conditions of the penis, and other related to HPV infection [6]. About one-third to one-quarter of invasive penile cancers may be related to HR-HPV according to retrospective studies [7]. Male infection is usually asymptomatic [8,9], and this could explain why the incidence of HR-HPV associated cancers and pre-cancerous lesions are now increasing.

Since the risk of HPV infection and cervical cancer in females is significantly influenced by male behaviour [10,11], a greater understanding of the natural history of HPV infection in men is critical for cervical cancer prevention. Although there are no current recommendations regarding screening programmes for asymptomatic infection in men [12], investigations of the presence of HPV in men who are sexual partners of infected women are becoming more common.

Some of the most consistently reported risk factors for the acquisition of HPV infection in men are higher number of current and past sex partners (SP) [13], lack of male circumcision (MC) [14], younger age at first sexual intercourse (FSI) [15], lack of condom use [9], having a sex partner with high-grade squamous intraepithelial cervical lesions (HGLC) [16] and smoking status [17].

The strength of the reported associations vary depending on the features of the populations under examination and the HPV genotype involved, i.e., oncogenic, non-oncogenic or both.

Since it is known that HPV vaccination is a potential preventive approach for men, additional insight from epidemiological studies of HPV infection in men is needed.

The aim of this study was to establish relationships between lifestyle factors, genital warts (GW) and HR-HPV infection in a high-risk population: male sexual partners of women diagnosed with high-grade squamous cervical lesions.

## Materials and methods

### Study population

A cross-sectional study was conducted by the Urology Department of the University Hospital of Vigo. Between January 2014 and December 2016, 202 asymptomatic men older than 18 years were invited to participate in this study because their current partners (regular sexual intercourse for more than 1 year) presented HGCL (cervical intraepithelial neoplasia grade 2 or grade 3-carcinoma in situ) in the previous six months. These couples were selected from the Cervical Cancer Screening Consulting, Department of Obstetrics and Gynaecology, Vigo, Spain. Only 175 of 202 (86.6%) couples met the inclusion criteria for the study. Women were diagnosed by cytology, colposcopy and histological examination. HPV genotypes associated with lesions in women were found in 171 cases. After physical examination, a penile scraping was obtained and submitted to PCR assay to identify HPV carriers. The institutional review board approved the study (cod 2013/470 from the ethics committee of clinical investigation of Galicia Santiago de Compostela, Spain). Information concerning the research project was provided to all participants. Written informed consent was obtained from all couples. A genital examination was done to identify signs of flat, macular and acuminate lesions (GW). Men were invited to fill in a self-administered questionnaire on lifestyle, including sexual behaviour (SB). Because most men are not knowledgeable about the implications of a positive HPV test, the staff spent the necessary time educating men about HPV. We explained that a positive test for the virus does not necessarily put them at risk for disease. Participants did not receive any incentive for study involvement.

All HR-HPV positive men were invited to a clinical follow-up at 12 months. Condom use was recommended to all couples. Women were advised to take the HPV vaccine in accordance with Spanish recommendations to prevent new infections by different HR-HPV genotypes [18]. All women were treated for their HR-HP- related lesions.

### Specimen collection

Three, dry cytobrushes for each male were used to scrape the genitalia three times to collect exfoliated cells from different penile areas, including the dorsal and ventral penile area, external and internal surface of prepuce, coronal sulcus, glans and distal urethra. The three samples were combined and collected into one single vial containing molecular biology grade TE buffer pH 8.0 (AppliChem GmbH, Darmstadt, Germany). Samples were maintained at 2–8°C and processed within 24–72 hours after collection.

### Epidemiological survey

The following variables were studied: age, nationality, HR-HPV infection and specific HPV genotype, age at first sexual intercourse (FSI), number of sexual partners (SP) in the year preceding the study, number of sexual partners up to the date of the study, smoking in the last year, circumcision, regular condom use in the last year, and presentation of genital warts. An extended questionnaire (S1 Appendix) was validated in a previous study by our team [4] with the assistance of a research statistician, and only those questions considered the most interesting for this study and population were selected.

### HPV DNA detection and genotyping

DNA was isolated using the QIAamp MinElute Media Kit (Qiagen, Hilden, Germany). The extracted nucleic acids were stored at -20°C. An aliquot of the original sample was also stored at -20°C. Amplification and detection were carried out using the Linear Array HPV

**Table 1. HPV genotypes detected in this study.**

| IARC classification | HPV genotypes                                  |
|---------------------|------------------------------------------------|
| HR-HPV              | 16, 18, 31, 33, 35, 39, 45, 51, 52, 56, 58, 59 |
| pHR-HPV             | 26, 34, 53, 66, 67, 68, 69, 70, 73, 82         |
| LR-HPV              | 6, 11                                          |

IARC: International Agency for Research on Cancer. HR-HPV: high-risk HPV genotypes; pHR: probable/possible high-risk genotypes, LR: low-risk genotype. V. Bouvard [1]

<https://doi.org/10.1371/journal.pone.0184492.t001>

Genotyping Test (Linear Array. Roche Diagnostics, Mannheim, Germany) according to the manufacturer's instructions. We described the distribution of 21 HR-HPV genotypes classified as HR (HR-HPV, IARC Group 1 carcinogens) or probable/possible HR (pHR-HPV, IARC Group 2A/B carcinogens) (Table 1) by the International Agency for Research on Cancer Monograph Working Group [1]. HPV types 30, 85, and 97 were not included in this study because the genotyping test used in this study does not allow their detection. We also described the distribution of 2 low-risk HPV genotypes involved in genital warts (HPV 6 and 11). This test also detects human beta-globin to control the sample adequacy and quality in addition to success in DNA extraction and PCR (internal control).

## Statistical analysis

Age and standard deviation were calculated. Qualitative variables were compared using the Chi-square test. The odds ratio (OR) and corresponding 95% confidence interval (95% CI) were calculated. A  $p$  value  $<0.05$  was considered statistically significant. Multivariate logistic regression analysis was used to evaluate factors that were independently associated with HR-HPV detection and with 12 months persistence of HR-HPV infection in males (step-wise logistic regression models). Only variables with  $p \leq 0.25$  in the bivariate analysis were included in the multivariate analysis. A manual stratified analysis was conducted to explore potential interactions and additive effects among variables. SPSS version 19.0 (Statistical Package for Social Sciences, Chicago, IL, USA) was used for statistical analysis.

## Results

A total of 175 couples were included. The average age of men was  $38.6 \pm 8.7$  (22–70) years. The average age of women was  $36.1 \pm 8.0$  (22–65) years. The prevalence of HR-HPV infection was 45.1% (79/175) in men and 97.7% (167/171) in their female partners. Their distribution is shown in Fig 1A. HPV16 was the most frequent genotype and was detected in 21.1% (37/175) of infected men. Multiple HR-HPV infections were detected in 26.3% (46/175) of men (for the distribution see S1 Table). Genital warts were diagnosed in 10.3% (18/175). The epidemiological characteristics are described in Table 2.

Smoker status (54.8% (51/93) vs. 34.1% (28/82), OR 2.3; 95%CI: 1.2–4.3) and the presence of genital warts (77.2% (13/18) vs. 42% (66/157), OR 3.5; 95%CI: 1.2–10.5) were associated with an increased risk for HR-HPV infection in men in the univariate analysis. Being under 16 years old at first sexual intercourse was also associated with an increased risk for HR-HPV infection in men (Table 3). Male circumcision, condom use, lifetime sexual partners and monogamous relationship with an HPV-infected woman in the last year were factors that were not associated with an increased risk for HR-HPV infection. In the multivariate analysis, genital warts (OR 3.9, 95% CI: 1.3–11.9) and smoking habit (OR 2.4, 95% CI: 1.3–4.6) were associated with a higher risk for HR-HPV infection in this male population (Table 3).

(A) At the beginning of the study

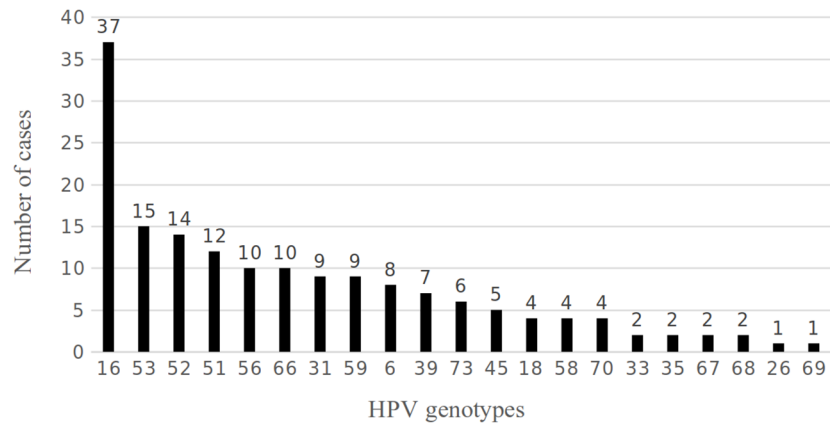

(B) At one year follow up

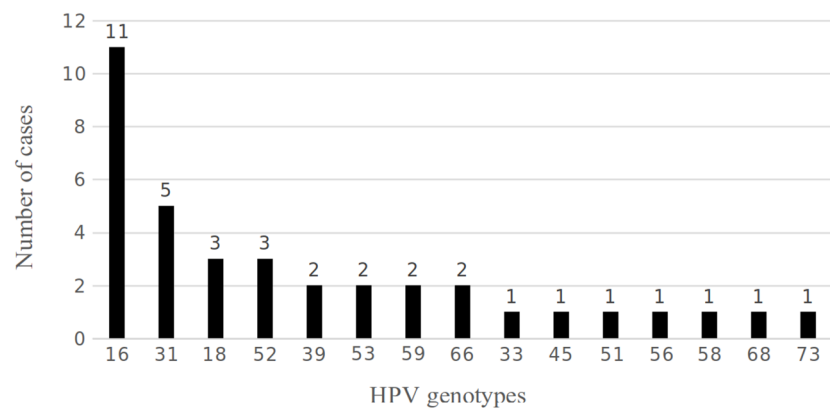

**Fig 1. HPV genotype distribution.** (A) Number of cases shown for each HPV genotype at the beginning of the study. (B) Number of cases shown for each HPV genotype after one year follow up.

<https://doi.org/10.1371/journal.pone.0184492.g001>

A total of 55 HR-HPV positive patients fulfilled criteria for a one-year follow-up. All HPV positive men received a letter of reminder for the follow-up date. Among them, 28 (50.9%) agreed to complete the follow-up and attended the scheduled appointment. Mean age, HPV16 infection and severity of female histological alterations were similar between those who agreed to complete the follow-up and those who did not. The same HR-HPV genotype was found in 71.4% (20/28). HPV16 was found in 55% (11/20) of patients with the same genotype infection at the 12-month follow-up. Their distribution is shown in Fig 1B. Being under 16 years old at first sexual intercourse ( $p = 0.686$ ), smoking status ( $p = 0.615$ ), genital warts ( $p = 0.311$ ), male circumcision ( $p = 0.503$ ), condom use ( $p = 1$ ), lifetime sexual partners ( $p = 1$ ) and monogamous relationship with an HPV-infected woman in the last year ( $p = 0.295$ ) were not associated with an increased risk for HR-HPV infection at the one-year follow-up.

## Discussion

The objective of this study was to assess the risk factors associated with HR-HPV infection in a high-risk male population. Male SPs of women with HGCL have been the focus of previous studies [8,19–21]. In our population, the prevalence of HR-HPV infection was high (i.e., almost half of the studied cases); this result is in agreement with data reported in similar

**Table 2. Sociodemographic, lifestyle and sexual behaviour characteristics of participants.**

|                                 | Men (n = 175) |
|---------------------------------|---------------|
| Age (mean ± SD); years          | 38.6 ± 8.7    |
| HPV +                           | 79 (45.1%)    |
| HPV 16 +                        | 37 (21.1%)    |
| Multiple HPV +                  | 46 (26.3%)    |
| <b>First sexual intercourse</b> |               |
| > 16 years                      | 108 (61.7%)   |
| ≤ 16 years                      | 67 (38.3%)    |
| <b>Lifetime sexual partners</b> |               |
| ≤ 5 sexual partners             | 40 (22.9%)    |
| > 5 sexual partners             | 135 (77%)     |
| <b>Recent sexual partners</b>   |               |
| 1 sexual partners               | 149 (85.1%)   |
| > 1 sexual partners             | 26 (14.9%)    |
| <b>Male circumcision</b>        |               |
| Yes                             | 23 (13.1%)    |
| No                              | 152 (86.9%)   |
| <b>Condom use</b>               |               |
| Yes                             | 67 (38.3%)    |
| No                              | 108 (61.7%)   |
| <b>Genital warts</b>            |               |
| Yes                             | 18 (10.3%)    |
| No                              | 157 (89.7%)   |
| <b>Smoking status</b>           |               |
| Yes                             | 93 (46.9%)    |
| No                              | 82 (53.1%)    |

SD: Standard Deviation; HPV: Human Papillomavirus infection

<https://doi.org/10.1371/journal.pone.0184492.t002>

studies (30%-68%) [8,22]. Polymerase chain reaction (PCR) is well established as the most sensitive detection method considering that there is no licensed test for HPV detection in men [20,23]. Because every woman was proven to be infected by HR-HPV in the previous months, all their male partners were exposed to the virus.

It is still unclear whether a reinfection pattern between couples could occur [4]. It was stated that some immune protection from viral antibodies induced by past exposure would result in less overall detection of incidental infection among long-lasting couples [24].

In addition to HPV16, which is the most common genotype [25], other genotypes were also involved in both single infection or co-infection with HPV16. The prevalence pattern for specific genotypes in men is still unclear [26]. Several studies have shown that the eight most prevalent HPV types in cervical cancer are geographically stable, with HPV16 being the most common [2].

The clearance rates for HPV infection have not been extensively investigated; however, findings suggest that HPV infection clearance is quicker in men than in women [27]. Nevertheless, HR-HPV infection with the same genotype at the one-year follow-up in our population was high (71.4%), probably due to HPV16 being the most common genotype (55%) and the fact that almost 100% of female from the studies couples were infected. None of the studied risk factors were associated with the detection of HPV infection at the one-year follow-up. Detection of the same genotype at 12 months could represent either HPV persistence or a

**Table 3. Bivariate and multivariate odds ratios for the associations of lifestyle and sexual behaviour characteristics with genital HPV prevalence among male partners of women recently diagnosed with high-grade cervical lesions.**

|                                        | HPV+ men     |             | Bivariate                   |         | Multivariate                   |         |
|----------------------------------------|--------------|-------------|-----------------------------|---------|--------------------------------|---------|
|                                        | Yes (n = 79) | No (n = 96) | OR <sub>crude</sub> (95%CI) | p-value | OR <sub>adjusted</sub> (95%CI) | p-value |
| Age at first sexual intercourse; n (%) |              |             |                             |         |                                |         |
| <16 years                              | 42 (38.9)    | 66 (61.1)   | 1.93 (1.05–3.59)            | 0.035   |                                |         |
| >16 years                              | 37 (55.2)    | 30 (44.8)   |                             |         |                                |         |
| Lifetime sexual partners; n (%)        |              |             |                             |         |                                |         |
| <5 sexual partners                     | 14 (35.0)    | 26 (65.0)   | 1.72 (0.83–3.59)            | 0.142   |                                |         |
| >5 sexual partners                     | 65 (48.1)    | 70 (51.9)   |                             |         |                                |         |
| Recent sexual partners; n (%)          |              |             |                             |         |                                |         |
| 1 sexual partners                      | 65 (43.6)    | 84 (56.4)   | 1.51 (0.65–3.48)            | 0.334   |                                |         |
| >1 sexual partners                     | 14 (53.8)    | 12 (46.2)   |                             |         |                                |         |
| Genital warts; n (%)                   |              |             |                             |         |                                |         |
| Yes                                    | 13 (72.2)    | 5 (27.8)    | 3.58 (1.22–10.5)            | 0.015   | 3.94 (1.30–11.9)               | 0.015   |
| No                                     | 66 (42.0)    | 91 (58.0)   |                             |         |                                |         |
| Condom use; n (%)                      |              |             |                             |         |                                |         |
| Yes                                    | 31 (46.3)    | 36 (53.7)   | 1.08 (0.58–1.99)            | 0.814   |                                |         |
| No                                     | 46 (44.4)    | 60 (55.6)   |                             |         |                                |         |
| Male circumcision; n (%)               |              |             |                             |         |                                |         |
| Yes                                    | 9 (39.1)     | 14 (60.9)   | 1.33 (0.54–3.25)            | 0.534   |                                |         |
| No                                     | 68 (46.1)    | 82 (53.9)   |                             |         |                                |         |
| Smoking status; n (%)                  |              |             |                             |         |                                |         |
| Yes                                    | 49 (54.8)    | 42 (45.2)   | 2.34 (1.27–4.32)            | 0.006   | 2.47 (1.32–4.62)               | 0.005   |
| No                                     | 28 (34.1)    | 54 (65.9)   |                             |         |                                |         |

OR: Odds Ratio; HPV: Human Papillomavirus infection; CI: Confidence interval

<https://doi.org/10.1371/journal.pone.0184492.t003>

newly acquired infection. We highlight the importance of the clinical follow-up of these men, and the possible role of biopsy if visible lesions are detected.

As we reported previously [28], in our population smoking habits increased the risk of prevalent HR-HPV infection by 2.4-fold in males. These data are similar to those found in the HIM study. Smoking was previously identified as a risk factor for HPV infection in men [9,17,29]. Smoking has also been associated with HPV infection persistence, anal cancer and penile cancer in males [30] and is also a confirmed risk factor for cervical cancer risk in women [29]. At present, it is unclear how smoking may influence HPV infection in men, but several possible pathways could exist. Smoking could potentially increase the viral load by weakening cellular immune responses [31]. Since smoking cessation could be an important factor for the prevention of HPV-related diseases in both men and women, further studies focusing on the impact of smoking on HPV infection in men could be carried out.

In the present study, the prevalence of genital warts was 10.3%, which was lower than that shown in previous studies (17%) [32]. Genital warts are common in both genders and have a lower rate of occurrence in countries with a high HPV vaccination coverage [33]. The diagnosis of genital warts was the most important risk factor for HR-HPV infection in our population. Males presenting genital warts had up to 4-fold higher risk of HR-HPV infection, probably because low-risk HPV genotypes causing genital warts share transmission pathways with other HR-HPV genotypes. Co-infection with oncogenic and non-oncogenic genotypes is common [34]. A randomized, controlled trial of an adjuvanted human papillomavirus (HPV) type 6 L2E7 vaccine showed infection of external anogenital warts with multiple HPV types

and failure of therapeutic vaccination, and it has also been described that patients with GW belong to a high-risk population group for HPV-related cancers [32] due to the increased likelihood of infection with oncogenic HPV genotypes.

In this study, certain sexual behaviours were associated with HR-HPV infection in men, similarly to previous reports [14,35]. For Spanish men, the average age at first sexual intercourse was 16.3 years old according to the YOURLIFE project [36]. In this study, early sexual debut (younger than 16 years old) was the third most important risk factor for HPV infection. Some authors have shown similar results [37], while other authors found different results that could be attributable not only to the age range but also to geographical characteristics [38].

Burchell *et al.* reported that 64.4% of positive subjects had  $\geq 5$  lifetime sexual partners in their population [39], which is in line with our results (54.7%). In western populations, the number of lifetime sexual partners in men and women are both relatively high, with little differences between the sexes. A higher number of sexual partners was not correlated with a higher HR-HPV prevalence in this study. This association was also absent in countries with high HPV prevalence in men such as Brazil, Colombia [13] and Mexico [38]. One explanation for this lack of association may be the geographical diversity and inaccuracy of self-reported information on sexual background. The ongoing HIM prospective multi-national study in the United States, Brazil and Mexico could clarify this issue.

Although 81.8% of HPV infected men in our population were monogamous in the previous year, this fact was not associated with higher or lower HR-HPV prevalence. In contrast, Nielson *et al.* found an association between HPV infection and number of sexual partners during the previous three months. These results might also be explained by the inclusion of low-risk genotypes in their study or by the shorter time after infection that reduced the possibility of clearing the viral infection. These two factors may have led to a higher overall prevalence.

As in other studies [28,40] we did not find evidence of a protective effect of circumcision on HPV prevalence. Similarly, in the literature it remains still unclear whether circumcision has a protective effect against HPV infection [41]. In contrast, Castellsagué *et al.* have provided epidemiologic evidence that male circumcision was associated with a reduced risk of genital infection in males [42]. Even though the protection pathway is unclear, circumcision was classically associated with the reduced persistence of HPV infection in men [43]. Removal of the foreskin could minimize the chance for new infections or could result in an increased clearance of pre-existing infections [44]. Our results could be biased because circumcision is not very common in our geographical area; thus, the statistical power to detect an association between circumcision and HPV prevalence was low. Moreover, our analysis could not assess specific associations limited to the glans penis, the area expected to be most likely protected by removal of the foreskin [45].

We did not find the expected protective effect of condom use on HPV prevalence. The effectiveness of condom use is still under discussion. Given that the virus is transmitted by skin to skin contact, condom usage has been assumed to be less effective against HPV infection compared to other sexual diseases transmitted by semen or vaginal secretions. Some authors have also reported high HPV prevalence even among those cases who report regular condom use [46]. By contrast, some studies have revealed that incorrect use of condoms increases the risk of cervical infection [35] and could be associated with a lower regression rate of cervical intraepithelial neoplasia grades 2–3 [47] in female partners.

One limitation of our study was the small sample size. Moreover, in our study, female lifestyle habits (including sexual behaviour) and histories of other sexually transmitted diseases were unknown and therefore could not be assessed. Differences between this study and previously published studies in sample collection, DNA extraction and HPV genotyping methods



may also have influenced the results between studies, making it difficult to directly compare results.

Males are not only vectors but may also play a major role in the prevention of HPV-related diseases [48]. Men can acquire HPV-associated conditions and then transmit the virus to their partner and vice versa [29]. Long-term follow up may contribute to increasing knowledge of the influence of persistent HPV infection in males and potential recurrence in their sexual partners after treatment.

Although similar studies have been conducted in different countries, it is important to evaluate the different features of HPV infection in men from different populations to confirm these results.

Future trials on HPV vaccines in males should be carried out to assess the potential impact not only on the presence of penile HPV infection but also on penile subclinical lesions as a surrogate measure for the efficacy of vaccination.

## Conclusions

The presence of genital warts and smoking status seem to be associated with a higher risk of HR-HPV infection in male, and earlier sexual debut could increase this risk. Extensive knowledge of the natural history of HR-HPV infection in males could be an important goal for the design and implementation of potential prevention strategies for HPV-related disease in men, specifically for high-risk populations such as males in relationships with females after treatment for high-grade cervical lesions. Our results could contribute to improve the existing HPV prevention strategies, including targeted strategies.

## Supporting information

**S1 Appendix. Lifestyle questionnaire.**

(PDF)

**S1 Table. List of HPV genotypes found in multiple infection.**

(PDF)

## Acknowledgments

We thank Research Unit from the University Hospital of Vigo, Spain for the statistical analysis and review of the manuscript. We also thank nursing team, especially Carmen Lago from the Urology Department of the University Hospital of Vigo, for their excellent help in this research, collecting patients. We thank M Consuelo Reboredo from the Gynaecology Department and the laboratory technicians of the Microbiology Department of the University Hospital of Vigo, for their support of the study.

## Author Contributions

**Data curation:** Amparo Iñarrea, Angel de la Orden.

**Investigation:** Elena Lopez-Diez.

**Methodology:** Elena Lopez-Diez, Sonia Perez.

**Project administration:** Elena Lopez-Diez.

**Validation:** Manuel Carballo, Maximo Castro, Sheila Almuster, Ruben Montero, Miguel Perez, Jorge Sanchez.

**Visualization:** Manuel Carballo, Amparo Iñarrea, Angel de la Orden, Maximo Castro, Moises Rodríguez, Sheila Almuster, Ruben Montero, Miguel Perez, Jorge Sanchez, Antonio Ojea.

**Writing – original draft:** Elena Lopez-Diez.

**Writing – review & editing:** Sonia Perez.

## References

1. Bouvard V, Baan R, Straif K, Grosse Y, Secretan B, El Ghissassi F, et al. A review of human carcinogens—Part B: biological agents. *Lancet Oncol*. 2009; 10: 321–322. PMID: [19350698](#)
2. Arbyn M, Tommasino M, Depuydt C, Dillner J. Are twenty human papillomavirus types causing cervical cancer? *J Pathol*. 2014; n/a–n/a. <https://doi.org/10.1002/path.4424> PMID: [25124771](#)
3. Park IU, Palefsky JM. Evaluation and Management of Anal Intraepithelial Neoplasia in HIV-Negative and HIV-Positive Men Who Have Sex with Men. *Curr Infect Dis Rep*. 2010; 12: 126–133. <https://doi.org/10.1007/s11908-010-0090-7> PMID: [20461117](#)
4. Pérez-Castro S, Lorenzo-Mahía Y, Iñarrea Fernández A, Lamas-González MJ, Sarán-Díez MT, Rubio-Alarcón J, et al. Cervical intraepithelial neoplasia grade 2 or worse in Galicia, Spain: HPV 16 prevalence and vaccination impact. *Enferm Infecc Microbiol Clin*. 2013; <https://doi.org/10.1016/j.eimc.2013.09.011> PMID: [24274937](#)
5. de Bruijn RE, Heideman DAM, Kenter GG, van Beurden M, van Tinteren H, Horenblas S. Patients with penile cancer and the risk of (pre)malignant cervical lesions in female partners: a retrospective cohort analysis. *BJU Int*. 2013; 112: 905–908. <https://doi.org/10.1111/bju.12237> PMID: [23905914](#)
6. López-Romero R, Iglesias-Chiesa C, Alatorre B, Vázquez K, Piña-Sánchez P, Alvarado I, et al. HPV frequency in penile carcinoma of Mexican patients: important contribution of HPV16 European variant. *Int J Clin Exp Pathol*. 2013; 6: 1409–1415. PMID: [23826423](#)
7. Alemany L, Cubilla A, Halec G, Kasamatsu E, Quirós B, Masferrer E, et al. Role of Human Papillomavirus in Penile Carcinomas Worldwide. *Eur Urol*. 2016; 69: 953–961. <https://doi.org/10.1016/j.eururo.2015.12.007> PMID: [26762611](#)
8. López Diez E, Pérez S, Iñarrea A, de la Orden A, Castro M, Almuster S, et al. Prevalence and concordance of high-risk papillomavirus infection in male sexual partners of women diagnosed with high grade cervical lesions. *Enferm Infecc Microbiol Clin*. 2016; <https://doi.org/10.1016/j.eimc.2016.02.014> PMID: [27004428](#)
9. Nielson CM, Harris RB, Dunne EF, Abrahamsen M, Papenfuss MR, Flores R, et al. Risk factors for anogenital human papillomavirus infection in men. *J Infect Dis*. 2007; 196: 1137–1145. <https://doi.org/10.1086/521632> PMID: [17955431](#)
10. Schillaci R, Capra G, Bellavia C, Ruvolo G, Scazzone C, Venezia R, et al. Detection of oncogenic human papillomavirus genotypes on spermatozoa from male partners of infertile couples. *Fertil Steril*. 2013; 100: 1236–1240. <https://doi.org/10.1016/j.fertnstert.2013.06.042> PMID: [23891022](#)
11. Castellsagué X, Muñoz N. Chapter 3: Cofactors in human papillomavirus carcinogenesis—role of parity, oral contraceptives, and tobacco smoking. *J Natl Cancer Inst Monographs*. 2003; 20–28. PMID: [12807941](#)
12. McGinley KF, Hey W, Sussman DO, Brown GA. Human papillomavirus testing in men. *J Am Osteopath Assoc*. 2011; 111: S26–28. PMID: [21415376](#)
13. Franceschi S, Castellsagué X, Dal Maso L, Smith JS, Plummer M, Ngelangel C, et al. Prevalence and determinants of human papillomavirus genital infection in men. *Br J Cancer*. 2002; 86: 705–711. <https://doi.org/10.1038/sj.bjc.6600194> PMID: [11875730](#)
14. Dunne EF, Park IU. HPV and HPV-associated diseases. *Infect Dis Clin North Am*. 2013; 27: 765–778. <https://doi.org/10.1016/j.idc.2013.09.001> PMID: [24275269](#)
15. Baldwin SB, Wallace DR, Papenfuss MR, Abrahamsen M, Vaught LC, Kornegay JR, et al. Human papillomavirus infection in men attending a sexually transmitted disease clinic. *J Infect Dis*. 2003; 187: 1064–1070. <https://doi.org/10.1086/368220> PMID: [12660920](#)
16. Bleeker MCG, Hogewoning CJA, Voorhorst FJ, van den Brule AJC, Snijders PJF, Starink TM, et al. Condom use promotes regression of human papillomavirus-associated penile lesions in male sexual partners of women with cervical intraepithelial neoplasia. *Int J Cancer*. 2003; 107: 804–810. <https://doi.org/10.1002/ijc.11473> PMID: [14566831](#)
17. Schabath MB, Villa LL, Lazcano-Ponce E, Salmerón J, Quiterio M, Giuliano AR, et al. Smoking and human papillomavirus (HPV) infection in the HPV in Men (HIM) study. *Cancer Epidemiol Biomarkers Prev*. 2012; 21: 102–110. <https://doi.org/10.1158/1055-9965.EPI-11-0591> PMID: [22016473](#)

18. Torné Bladé A, Bayas Rodríguez JM, Castellsagué Piqué X, Sánchez MC, García García E, Martínez Escoriza JC, et al. Vacunación frente al cáncer de cérvix en mujeres fuera de los programas de vacunación sistemática, con o sin infección por el virus del papiloma humano o lesión cervical. Encuesta de opinión y recomendaciones. *Progresos de Obstetricia y Ginecología*. 2012; 55: 10–31. [https://doi.org/10.1016/S0304-5013\(12\)73065-0](https://doi.org/10.1016/S0304-5013(12)73065-0)
19. Giraldo PC, Eleutério J, Cavalcante DIM, Gonçalves AKS, Romão JAA, Eleutério RMN. The role of high-risk HPV-DNA testing in the male sexual partners of women with HPV-induced lesions. *Eur J Obstet Gynecol Reprod Biol*. 2008; 137: 88–91. <https://doi.org/10.1016/j.ejogrb.2006.12.026> PMID: 17485158
20. Nicolau SM, Camargo CGC, Stávale JN, Castelo A, Dôres GB, Lörincz A, et al. Human papillomavirus DNA detection in male sexual partners of women with genital human papillomavirus infection. *Urology*. 2005; 65: 251–255. <https://doi.org/10.1016/j.urology.2004.09.031> PMID: 15708032
21. Martín-Ezquerria G, Fuste P, Larrazabal F, Lloveras B, Fernandez-Casado A, Belosillo B, et al. Incidence of human papillomavirus infection in male sexual partners of women diagnosed with CIN II-III. *Eur J Dermatol*. 2012; 22: 200–204. <https://doi.org/10.1684/ejd.2011.1622> PMID: 22240393
22. Afonso LA, Rocha WM, Carestiatto FN, Dobao EA, Pesca LF, Passos MRL, et al. Human papillomavirus infection among sexual partners attending a Sexually Transmitted Disease Clinic in Rio de Janeiro, Brazil. *Braz J Med Biol Res*. 2013; 46: 533–538. <https://doi.org/10.1590/1414-431X20132519> PMID: 23739745
23. Bar-Am A, Niv J. The role of HPV DNA in the evaluation and follow-up of asymptomatic male sexual partners of females with CIN3. *Eur J Gynaecol Oncol*. 2007; 28: 207–210. PMID: 17624088
24. Nyitray AG, Iannacone MR. The epidemiology of human papillomaviruses. *Curr Probl Dermatol*. 2014; 45: 75–91. <https://doi.org/10.1159/000358370> PMID: 24643179
25. Munk AC, Ovestad IT, Gudlaugsson E, Løvslett K, Fiane B, van Diermen-Hidle B, et al. Consistent condom use increases spontaneous regression in high-risk non-HPV16 but not in HPV16 CIN2-3 lesions, a prospective population-based cohort study. *Infect Agents Cancer*. 2012; 7: 30. <https://doi.org/10.1186/1750-9378-7-30> PMID: 23126423
26. Arroyo LS, Basaras M, Arrese E, Hernández S, Esteban V, Cisterna R. Distribution of genital human papillomavirus genotypes in benign clinical manifestations among men from Northern Spain. *BMC Public Health*. 2016; 16: 81. <https://doi.org/10.1186/s12889-016-2713-x> PMID: 26817692
27. Reiter PL, Pendergraft WF, Brewer NT. Meta-analysis of human papillomavirus infection concordance. *Cancer Epidemiol Biomarkers Prev*. 2010; 19: 2916–2931. <https://doi.org/10.1158/1055-9965.EPI-10-0576> PMID: 20833971
28. López-Díez E, Pérez S, Iñarrea A. Diagnosis and Prevalence of High-Risk Human Papillomavirus Infection in Heterosexual Men. In: Rajkumar R, editor. *Human Papillomavirus—Research in a Global Perspective*. InTech; 2016. <http://www.intechopen.com/books/human-papillomavirus-research-in-a-global-perspective/diagnosis-and-prevalence-of-high-risk-human-papillomavirus-infection-in-heterosexual-men>
29. Bosch FX, Castellsagué X, Muñoz N, de Sanjosé S, Ghaffari AM, González LC, et al. Male sexual behavior and human papillomavirus DNA: key risk factors for cervical cancer in Spain. *J Natl Cancer Inst*. 1996; 88: 1060–1067. PMID: 8683637
30. Daling JR, Madeleine MM, Johnson LG, Schwartz SM, Shera KA, Wurscher MA, et al. Penile cancer: importance of circumcision, human papillomavirus and smoking in in situ and invasive disease. *Int J Cancer*. 2005; 116: 606–616. <https://doi.org/10.1002/ijc.21009> PMID: 15825185
31. Kalra R, Singh SP, Savage SM, Finch GL, Sopori ML. Effects of cigarette smoke on immune response: chronic exposure to cigarette smoke impairs antigen-mediated signaling in T cells and depletes IP3-sensitive Ca(2+) stores. *J Pharmacol Exp Ther*. 2000; 293: 166–171. PMID: 10734166
32. Blomberg M, Friis S, Munk C, Bautz A, Kjaer SK. Genital warts and risk of cancer: a Danish study of nearly 50 000 patients with genital warts. *J Infect Dis*. 2012; 205: 1544–1553. <https://doi.org/10.1093/infdis/jis228> PMID: 22427679
33. Smith MA, Liu B, McIntyre P, Menzies R, Dey A, Canfell K. Fall in genital warts diagnoses in the general and indigenous Australian population following implementation of a national human papillomavirus vaccination program: analysis of routinely collected national hospital data. *J Infect Dis*. 2015; 211: 91–99. <https://doi.org/10.1093/infdis/jiu370> PMID: 25117753
34. Vandepapeliere P, Barrasso R, Meijer CJLM, Walboomers JMM, Wettendorff M, Stanberry LR, et al. Randomized controlled trial of an adjuvanted human papillomavirus (HPV) type 6 L2E7 vaccine: infection of external anogenital warts with multiple HPV types and failure of therapeutic vaccination. *J Infect Dis*. 2005; 192: 2099–2107. <https://doi.org/10.1086/498164> PMID: 16288373
35. Parada R, Morales R, Giuliano AR, Cruz A, Castellsagué X, Lazcano-Ponce E. Prevalence, concordance and determinants of human papillomavirus infection among heterosexual partners in a rural

- region in central Mexico. *BMC Infect Dis.* 2010; 10: 223. <https://doi.org/10.1186/1471-2334-10-223> PMID: 20667085
36. de Irala J, Osorio A, Carlos S, Ruiz-Canela M, López-del Burgo C. Mean age of first sex: do they know what we mean? *Arch Sex Behav.* 2011; 40: 853–855. <https://doi.org/10.1007/s10508-011-9779-4> PMID: 21618046
  37. Hebnæs JB, Olesen TB, Duun-Henriksen AK, Munk C, Norrild B, Kjaer SK. Prevalence of genital human papillomavirus among men in Europe: systematic review and meta-analysis. *J Sex Med.* 2014; 11: 2630–2644. <https://doi.org/10.1111/jsm.12652> PMID: 25088239
  38. Morales R, Parada R, Giuliano AR, Cruz A, Castellsagué X, Salmerón J, et al. HPV in female partners increases risk of incident HPV infection acquisition in heterosexual men in rural central Mexico. *Cancer Epidemiol Biomarkers Prev.* 2012; 21: 1956–1965. <https://doi.org/10.1158/1055-9965.EPI-12-0470> PMID: 22914530
  39. Burchell AN, Rodrigues A, Moravan V, Tellier P-P, Hanley J, Coutlée F, et al. Determinants of prevalent human papillomavirus in recently formed heterosexual partnerships: a dyadic-level analysis. *J Infect Dis.* 2014; 210: 846–852. <https://doi.org/10.1093/infdis/jiu200> PMID: 24683197
  40. Lu B, Wu Y, Nielson CM, Flores R, Abrahamsen M, Papenfuss M, et al. Factors associated with acquisition and clearance of human papillomavirus infection in a cohort of US men: a prospective study. *J Infect Dis.* 2009; 199: 362–371. <https://doi.org/10.1086/596050> PMID: 19133808
  41. Zhu Y-P, Jia Z-W, Dai B, Ye D-W, Kong Y-Y, Chang K, et al. Relationship between circumcision and human papillomavirus infection: a systematic review and meta-analysis. *Asian J Androl.* 2017; 19: 125–131. <https://doi.org/10.4103/1008-682X.175092> PMID: 26975489
  42. Castellsagué X, Bosch FX, Muñoz N, Meijer CJLM, Shah KV, de Sanjose S, et al. Male circumcision, penile human papillomavirus infection, and cervical cancer in female partners. *N Engl J Med.* 2002; 346: 1105–1112. <https://doi.org/10.1056/NEJMoa011688> PMID: 11948269
  43. Lu B, Viscidi RP, Wu Y, Nyitray AG, Villa LL, Lazcano-Ponce E, et al. Seroprevalence of human papillomavirus (HPV) type 6 and 16 vary by anatomic site of HPV infection in men. *Cancer Epidemiol Biomarkers Prev.* 2012; 21: 1542–1546. <https://doi.org/10.1158/1055-9965.EPI-12-0483> PMID: 22761306
  44. Gray RH, Serwadda D, Kong X, Makumbi F, Kigozi G, Gravitt PE, et al. Male circumcision decreases acquisition and increases clearance of high-risk human papillomavirus in HIV-negative men: a randomized trial in Rakai, Uganda. *J Infect Dis.* 2010; 201: 1455–1462. <https://doi.org/10.1086/652184> PMID: 20370483
  45. Albero G, Villa LL, Lazcano-Ponce E, Fulp W, Papenfuss MR, Nyitray AG, et al. Male circumcision and prevalence of genital human papillomavirus infection in men: a multinational study. *BMC Infect Dis.* 2013; 13: 18. <https://doi.org/10.1186/1471-2334-13-18> PMID: 23327450
  46. Repp KK, Nielson CM, Fu R, Schafer S, Lazcano-Ponce E, Salmerón J, et al. Male human papillomavirus prevalence and association with condom use in Brazil, Mexico, and the United States. *J Infect Dis.* 2012; 205: 1287–1293. <https://doi.org/10.1093/infdis/jis181> PMID: 22396601
  47. Munk AC, Gudlaugsson E, Malpica A, Fiane B, Løvslett KI, Kruse A-J, et al. Consistent condom use increases the regression rate of cervical intraepithelial neoplasia 2–3. *PLoS ONE.* 2012; 7: e45114. <https://doi.org/10.1371/journal.pone.0045114> PMID: 23028792
  48. Andrews JC, Lawson HW. The Role of the Male in Preventing HPV-Related Diseases. *J Low Genit Tract Dis.* 2016; 20: 195–196. <https://doi.org/10.1097/LGT.0000000000000226> PMID: 27203704
